# Supplementary material for: Perencanaan dan Pembuatan Microcontroller Training System (MTS) 8031
Source: Royal Society of Chemistry journal article supplement (doi:10.1039/d3ra06335f), 2000-11-01
Supplement: d3ra06335f1.pdf [file d3ra06335f1.pdf]

## Supporting supplementary data

Supplementary Table T1; Chemical composition and percentage of phytochemicals identified by GC-MS analysis of *C. roseus* essential oil

| SR. No | Area % | RT (minutes) | Compound Name                   | Mol. wt. (g/mol) | Mol. formula                                  |
|--------|--------|--------------|---------------------------------|------------------|-----------------------------------------------|
| 1      | 0.14   | 4.178        | 1,2,4,4-Tetramethylcyclopentene | 124.22           | C <sub>9</sub> H <sub>16</sub>                |
| 2      | 0.40   | 6.577        | beta-Pinene                     | 136.23           | C <sub>10</sub> H <sub>16</sub>               |
| 3      | 1.19   | 6.660        | Gamma terpinene                 | 136              | C <sub>10</sub> H <sub>18</sub> O             |
| 4      | 36.03  | 6.898        | alpha-Pinene                    | 136.23           | C <sub>10</sub> H <sub>16</sub>               |
| 5      | 2.16   | 7.299        | Camphene                        | 136.23           | C <sub>10</sub> H <sub>16</sub>               |
| 6      | 1.53   | 7.363        | Terpinolene                     | 136.23           | C <sub>10</sub> H <sub>16</sub>               |
| 7      | 0.09   | 7.683        | Cyclopropane                    | 42.08            | C <sub>3</sub> H <sub>6</sub>                 |
| 8      | 0.09   | 7.691        | 2-Aminoresorcinol               | 125.13           | C <sub>6</sub> H <sub>7</sub> NO <sub>2</sub> |
| 9      | 0.13   | 8.08         | beta-Myrcene                    | 136.23           | C <sub>10</sub> H <sub>16</sub>               |
| 10     | 0.04   | 8.293        | 3,5-Octadiene                   | 110.2            | C <sub>8</sub> H <sub>14</sub>                |
| 11     | 0.28   | 8.561        | o-Isopropenyltoluene            | 132.2            | C <sub>10</sub> H <sub>12</sub>               |
| 12     | 0.09   | 8.805        | p-Cymene                        | 134.22           | C <sub>10</sub> H <sub>14</sub>               |
| 13     | 1.85   | 8.948        | o-Cymene                        | 134.22           | C <sub>10</sub> H <sub>14</sub>               |
| 14     | 1.47   | 9.049        | D-Limonene                      | 136.23           | C <sub>10</sub> H <sub>16</sub>               |
| 15     | 1.47   | 9.051        | Limonene                        | 136.24           | C <sub>10</sub> H <sub>16</sub>               |
| 16     | 0.81   | 9.141        | Eucalyptol                      | 154.25           | C <sub>10</sub> H <sub>16</sub> O             |
| 17     | 0.11   | 9.730        | Pinocarvone                     | 150.22           | C <sub>10</sub> H <sub>14</sub> O             |
| 18     | 0.04   | 9.995        | Cyclohexanol                    | 100.15           | C <sub>6</sub> H <sub>12</sub> O              |
| 19     | 0.26   | 10.333       | Methoxy(methyl)chlorosilane     | 324.9            | C <sub>19</sub> H <sub>17</sub> ClOSi         |
| 20     | 0.33   | 10.371       | Cyclopentanol                   | 86.13            | C <sub>5</sub> H <sub>10</sub> O              |
| 21     | 0.39   | 10.374       | Artemiseole                     | 152.23           | C <sub>10</sub> H <sub>16</sub> O             |
| 22     | 0.17   | 10.980       | 1-Phenylpropanol                | 136.19           | C <sub>9</sub> H <sub>12</sub> O              |

|    |      |        |                     |         |                                                |
|----|------|--------|---------------------|---------|------------------------------------------------|
| 23 | 0.19 | 11.065 | Thujone             | 152.23  | C <sub>10</sub> H <sub>16</sub> O              |
| 24 | 0.36 | 11.135 | Camphene            | 136.23  | C <sub>12</sub> H <sub>16</sub>                |
| 25 | 2.93 | 11.300 | alpha- Campholenal  | 152.23  | C <sub>10</sub> H <sub>16</sub> O              |
| 26 | 2.93 | 11.311 | Fumaric acid        | 116.07  | C <sub>4</sub> H <sub>4</sub> O <sub>4</sub>   |
| 27 | 3.37 | 11.660 | 1,4,9-Decatriene    | 136.23  | C <sub>10</sub> H <sub>16</sub>                |
| 28 | 5.66 | 11.816 | Trans-verbenol      | 152.237 | C <sub>10</sub> H <sub>16</sub> O              |
| 29 | 0.24 | 12.455 | Terpinen-4-ol       | 154.25  | C <sub>10</sub> H <sub>16</sub> O              |
| 30 | 0.09 | 12.547 | Ethanone            | 43.04   | C <sub>2</sub> H <sub>3</sub> O                |
| 31 | 0.65 | 12.630 | m-Cymen-8-ol        | 192.25  | C <sub>12</sub> H <sub>16</sub> O <sub>2</sub> |
| 32 | 0.17 | 12.981 | Acetic acid         | 60.052  | CH <sub>3</sub> COOH                           |
| 33 | 0.63 | 13.276 | trans-Carveol       | 152.23  | C <sub>10</sub> H <sub>16</sub> O              |
| 34 | 0.21 | 13.777 | Carvone             | 150.22  | C <sub>10</sub> H <sub>14</sub> O              |
| 35 | 0.38 | 13.891 | Isobutyric acid     | 136.23  | C <sub>10</sub> H <sub>16</sub>                |
| 36 | 2.96 | 14.966 | Camphenone          | 150.22  | C <sub>10</sub> H <sub>14</sub> O              |
| 37 | 0.22 | 15.579 | alpha-Campholenal   | 152.23  | C <sub>10</sub> H <sub>16</sub> O              |
| 38 | 1.18 | 15.772 | 2-Carene            | 136.23  | C <sub>10</sub> H <sub>16</sub>                |
| 39 | 0.17 | 16.364 | Copaene             | 204.35  | C <sub>15</sub> H <sub>24</sub>                |
| 40 | 0.49 | 16.863 | Octanoic acid       | 144.21  | C <sub>8</sub> H <sub>16</sub> O <sub>2</sub>  |
| 41 | 0.12 | 17.354 | alpha-Campholenal   | 152.23  | C <sub>10</sub> H <sub>16</sub> O              |
| 42 | 0.20 | 19.651 | Nerolidol           | 222     | C <sub>15</sub> H <sub>26</sub> O              |
| 43 | 0.11 | 25.832 | n-Hexadecanoic acid | 256.42  | C <sub>16</sub> H <sub>32</sub> O              |
| 44 | 1.12 | 28.693 | Incensole, acetate  | 334.49  | C <sub>21</sub> H <sub>34</sub> O              |
| 45 | 0.19 | 36.284 | Hexasiloxane        | 248.51  | O <sub>5</sub> Si <sub>6</sub>                 |

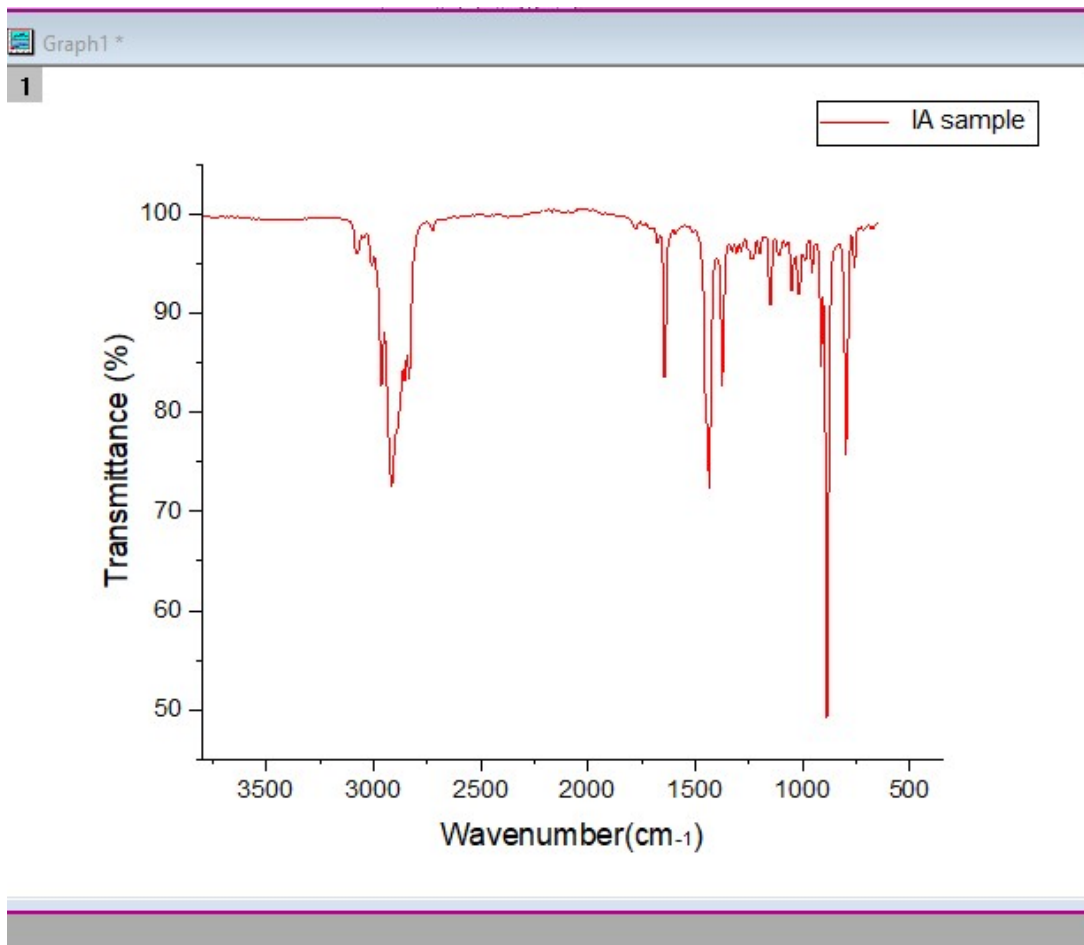

Supplementary figure S1; IR spectrum of incensole acetate.

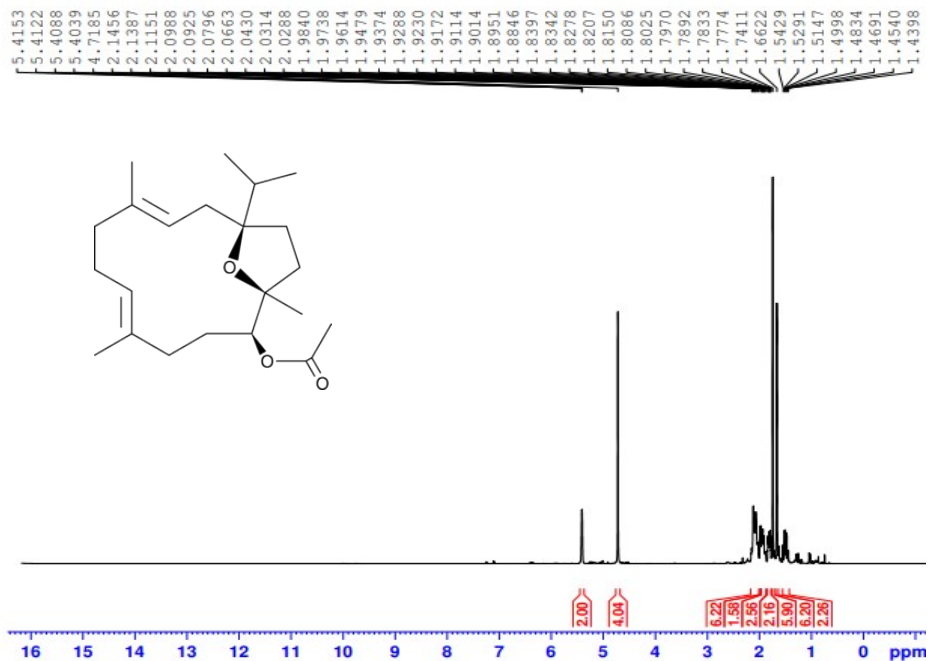

Supplementary figure S2; <sup>1</sup>H-NMR of incensole acetate

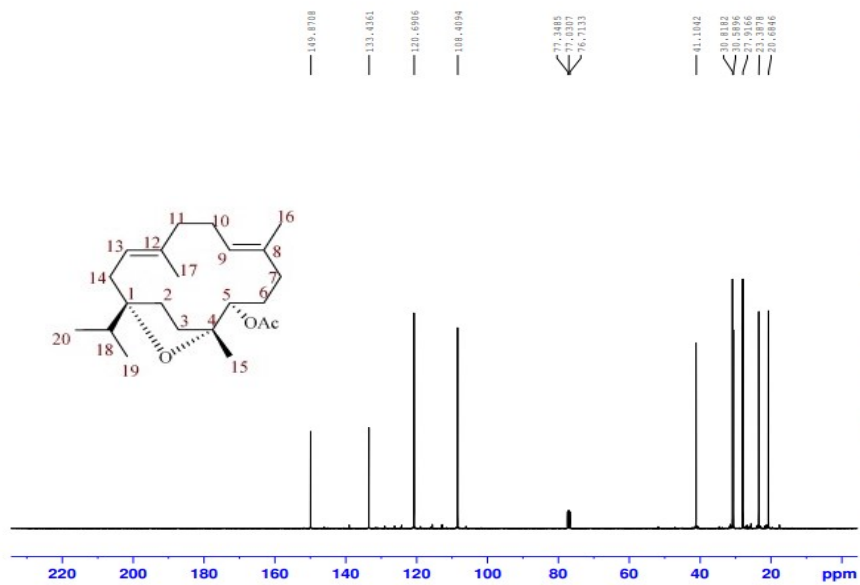

Supplementary figure S3; <sup>13</sup>C-NMR of incensole acetate

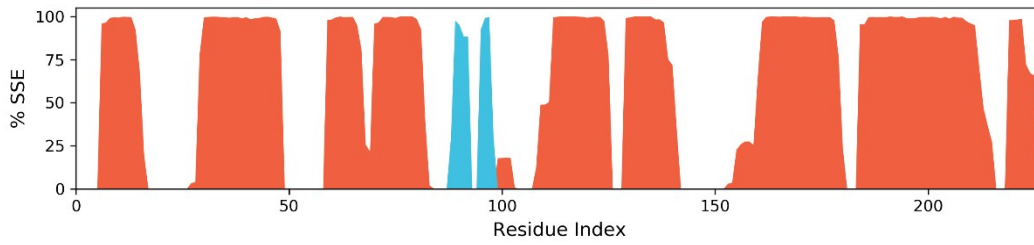

**Supplementary figure S4; MD simulation supporting figure**

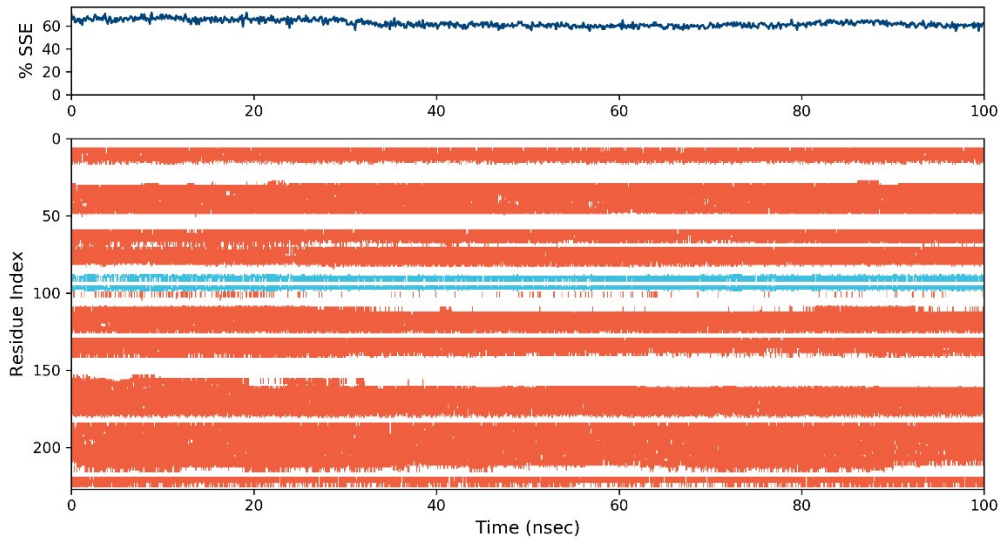

**Supplementary figure S5; Protein secondary structure elements (SSE) such as alpha-helices marked by orange and the beta-strands were labeled by cyan.**

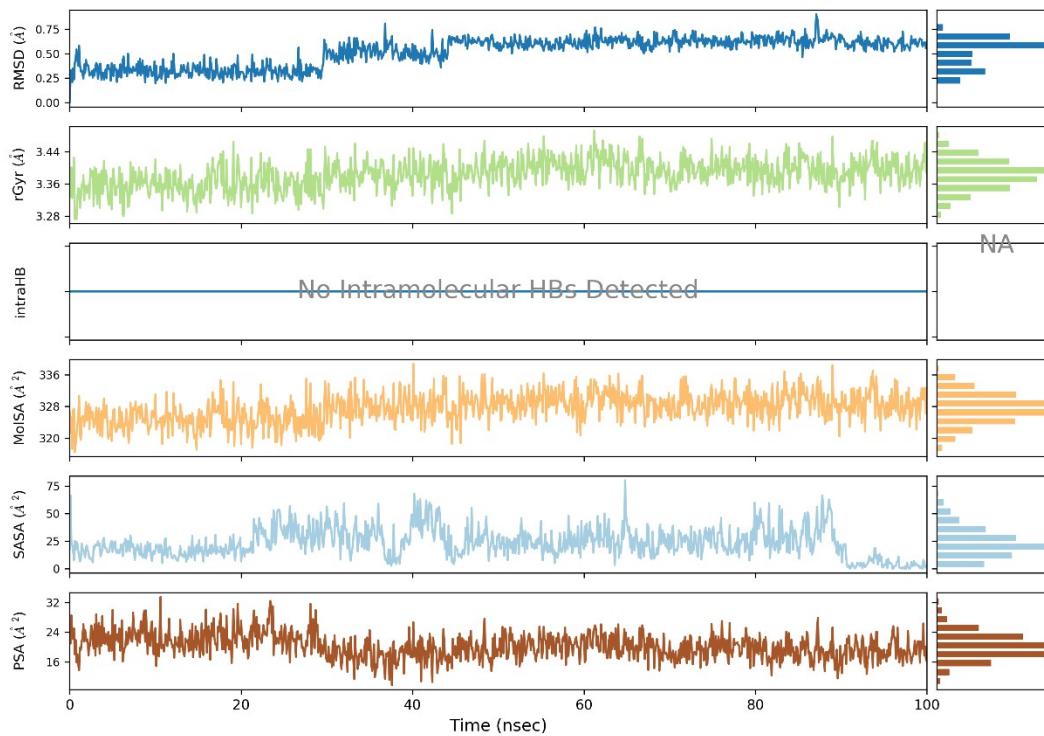

**Supplementary figure S6; MD simulation Ligand properties**

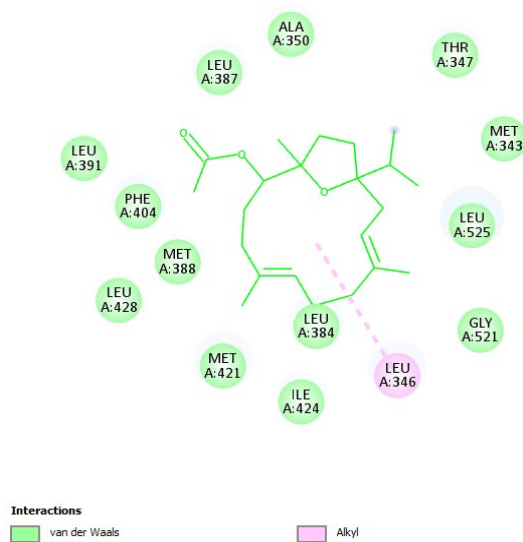

**A**

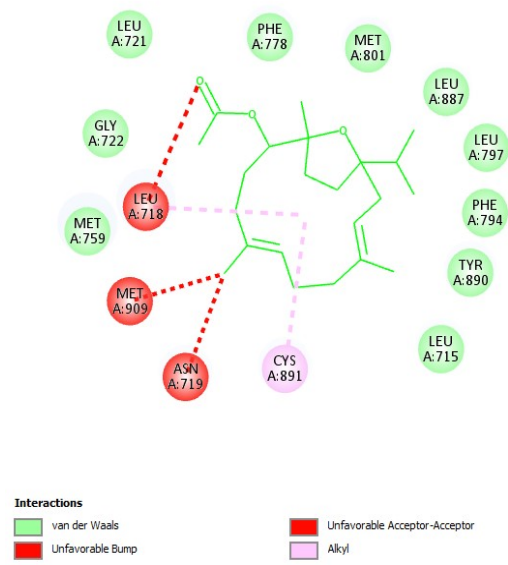

**B**

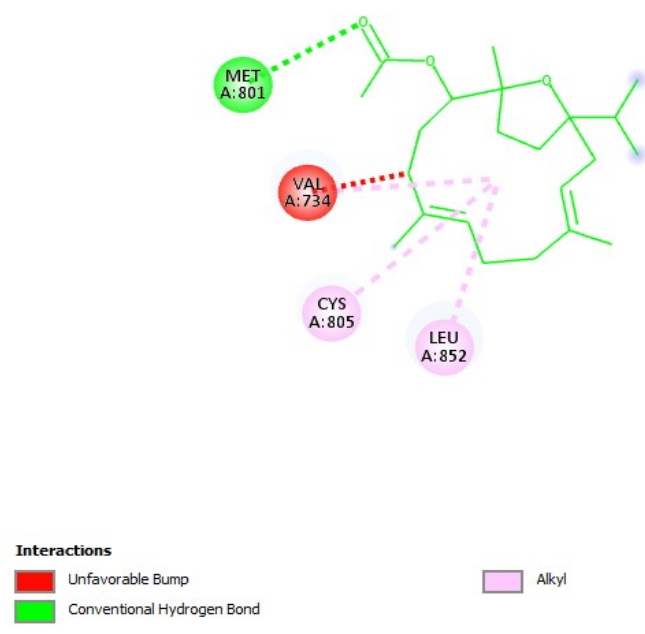

**C**

**Supplementary figure S7; 2D diagram of incensole acetate interactions with (A) Estrogen receptor (B) Progesterone receptor (C) HER2 receptor.**

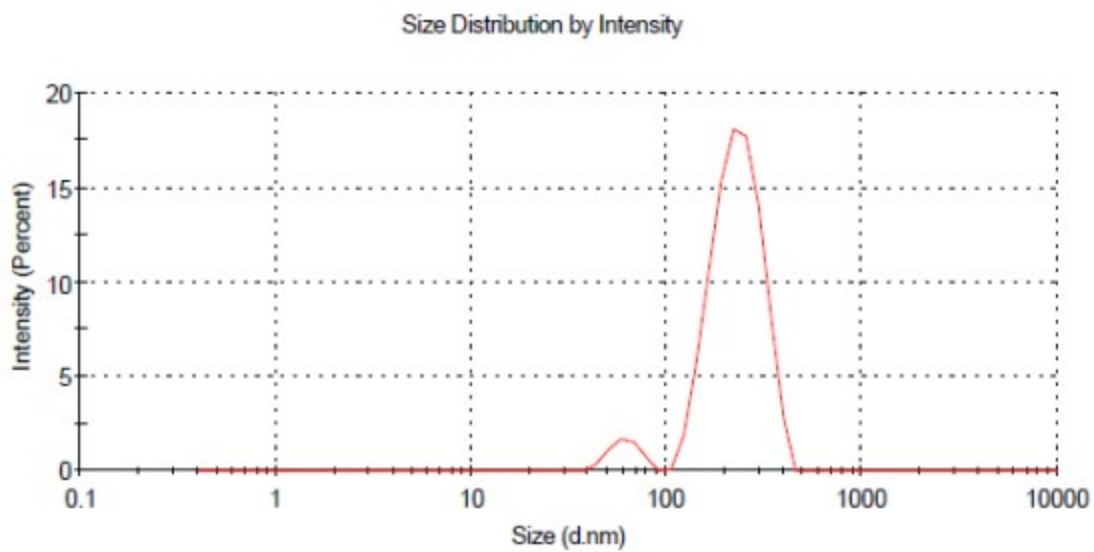

**Supplementary figure S8; Size-distribution analysis of NE**

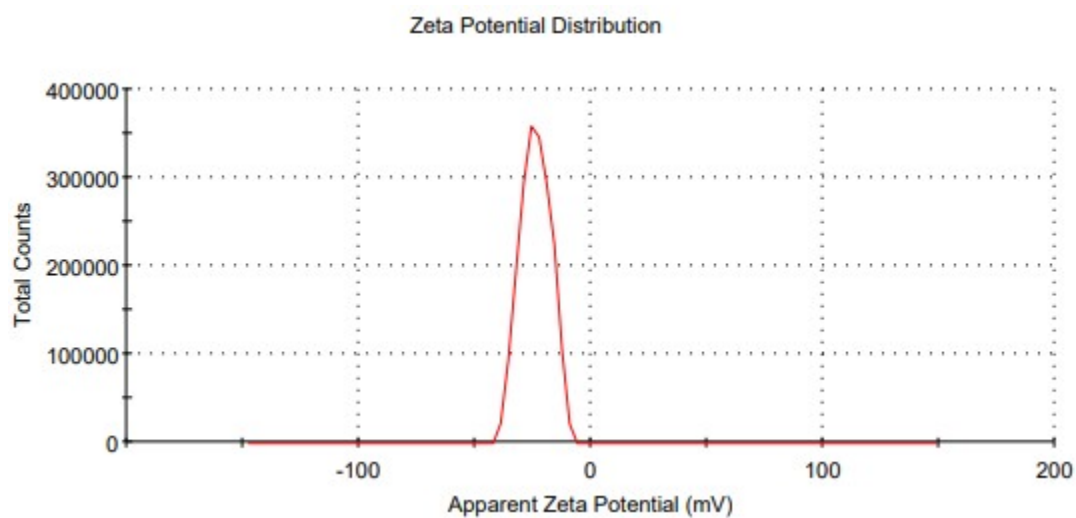

**Supplementary figure S9; Zeta potential analysis of NE**



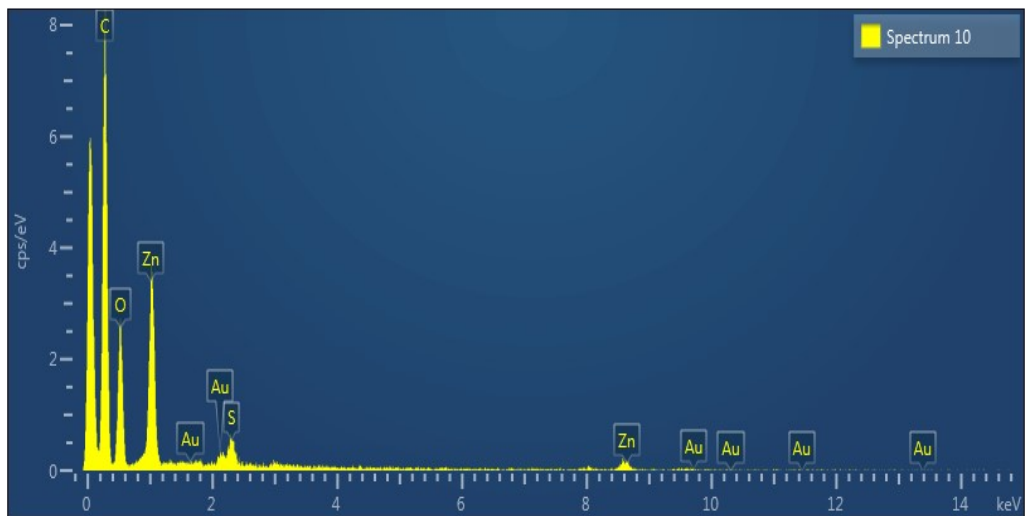

**Supplementary figure S10; EDX of Terpene I Nanoemulsion**
